# Supplementary material for: Knockout Mutants of OsPUB7 Generated Using CRISPR/Cas9 Revealed Abiotic Stress Tolerance in Rice
Source: Int J Mol Sci. 2023 Mar 10;24(6):5338. doi: 10.3390/ijms24065338 (PMC10048836; doi:10.3390/ijms24065338)
Supplement: Supplementary file 1 [file ijms-24-05338-s001.zip › (2023-2-14) Supplementary table.xlsx]

## Sheet: Supplementary Table S1
Supplementary Table S1. Information of 26 genes in various plant species.
Species	Accession NO.	Gene symbol	Amino acid sequence
Wheat	XP_044332417.1	LOC123053088	MAKPPPAEEEAAALRRRLRRLVATITAGGAGAEAFDEAAAALAALREAQVGGSRKGAPGEETRSANEAESVPAQFLCPISSKIMRDPVVVESGQQMSVLRISYRYGLKLSVIEHKCDHLITVLESSFLTYDRRYIAEWFSAGNQMCPQTQQVLLNTTLVPNLLIRSLIAEWCTENGFALSPLENQEEDHTCNSEQRTFDEIFNKITSSSNSTERKQAIKGLRLLTKRSSEFRAVLEERPDSISQMTFARFSNPGLQNDPQVVEDMVTIILNFSLHDSNKKIIGDDPEAIPFLIWALKSGDMGSRSNSAAAIFTLSALDSNKEKIGELGAIEPLIDLLEHGSIIAKKDAASAIFNLCMLHENRSIATRGGIVDVAIRAIGDQSLVEEFLAILALLSSNYD…
Goatgrass	XP_020159771.1	LOC109745042	MAKPPPAEEEAAALRRRLRRLVATITAGGAGAEAFDEAAAALAALREAQVGGSRKGAPGEETRSANEAESVPAQFLCPISSKIMRDPVVVESGQTYDRRYIAEWFSAGNQMCPQTQQVLLNTTLVPNLLIRSLIAEWCTENGFALSPLENQEEDHTCNSEQRTFDEIFNKITSSSNSTERKQAIKGLRLLTKRSSEFRAVLEERPDSISQMTFARFSNPGLQNDPQVVEDMVTIILNFSLHDSNKKIIGDDPEAIPFLIWALKSGDMGSRSNSAAAIFTLSALDSNKEKIGELGAIEPLIDLLEHGSIIAKKDAASAIFNLCMLHENRSIATRGGIVDVAIRAIGDQSLVEEFLAILALLSSNYDMVELMIEFGGATCMLQAMRESECKRSKENAAVVL…
Wheat	XP_044324173.1	LOC123045254	MAKPPPAEEEAAALRRRLRRLVATITVGGAGAEAFDEAAAALAALREAQVGGSRKGARGEETRSANEAESVPAQFLCPISSKIMRDPVVVESGQTYDRRYIAEWFSAGNQMCPQTQQVLLNTTLIPNLLIRSLIAEWCTENGFALSPLENQEEDHICNSEQRTFDEIFNKITSSSNSTERKQAIKGLRLLTKRSSEFRAVLEERPDSISQMTFARFSNPGLQNDPQVVEDMVTIILNFSLHDSNKKIIGDDPEAIPFLIWALKSGDMGSRSNSAAAIFTLSALDSNKEKIGELGAIEPLIDLLEHGSIIAKKDAASAIFNLCMLHENRSIATRSGIVDVAIRAIGDQSLVEEFLAILALLSSNYDMVELMIEFGGATCMLQAMRESECKRSKENAAVVL…
Wheat	XP_044457243.1	LOC123188996	MAKPPPAEEEAAALRRRLRRLVATITAGGAGAEAFDEAAAALAALREAQVGGSRKGARGEETRSANEAESVPAQFLCPISSKIMRDPVVVESGQTYDRRYIAEWFSAGNQMCPQTQQVLLNTTLIPNLLIRSLIAEWCTENGFALSPLEKQEEDHICNSEQRTFDEIFNKITSSSNSTERKQAIKGLRLLTKRSSEFRAVLEERPDSISQMTFARFSNPGLQNDPQVVEDMVTIILNFSLHDSNKKIIGDDPEAIPFLIWALKSGDMGSRSNSAAAIFTLSALDSNKEKIGELGAIEPLIDLLEHGSIIAKKDAASAIFNLCMLHENRSIATRSGIVDVAIRAIGDQSLVEEFLAILALLSSNYDMVELMIEFGGATCMLQAMRESECKRSKENAAVVL…
Emmer wheat	XP_037477562.1	LOC119354898	MAKPPPAEEEAAALRRRLRRLVATITAGGAGAEAFDEAAAALAALREAQVGGSRKGARGEETRSANEAESVPAQFLCPISSKIMRDPVVVESGQTYDRRYIAEWFSAGNQMCPQTQQVLLNTTLIPNLLIRSLIAEWCTENGFALSPLEKQEEDHICNSEQRTFDEIFNKITSSSNSTERKQAIKGLRLLTKRSSEFRAVLEERPDSISQMTFARFSNPGLQNDPQVVEDMVTIILNFSLHDSNKKIIGDDPEAIPFLIWALKSGDMGSRSNSAAAIFTLSALDSNKEKIGELGAIEPLIDLLEHGSIIAKKDAASAIFNLCMLHENRSIATRSGIVDVAIRAIGDQSLVEEFLAILALLSSNYDMVELMIEFGGATCMLQAMRESECKRSKENAAVVL…
Barley	XP_044966248.1	LOC123426471	MAKPPPAEEETAALRRRLRRLVATITAGGAGAEAFDEAATALSELREAHVGGSRKGARGEETRSAKEAESVPAQFLCPISSKIMRDPVVVESGQTYDRRFIADWFSAGNQMCPQTQQVLLNTTLIPNLLIRSLIAEWCTENGFALSPIENQEEDPICNSEQRTFDEIFNKITSSSNSTERKQAIKGLRLLTKRSSEFRAVLEERPDSISQMTFARFSNPGLQNDPQVVEDMVTIILNFSLHDSNKKIIGDDPEAIPFLIWALKSGDMGSRSNSAAAIFTLSALDSNKEKIGELGAIEPLIDLLEHGSIIAKKDAASAIFNLCMLHENRSIATRSGIVDVAIRAIGDQSLVEEFLAILALLSSNYDMVELMIEFGGASCMLQAMRESECKRSKENAAVIL…
Purple false brome	XP_003579564.2	LOC100845248	MSEKKAVEKKTGHRQNRKIKPPTRLSPLPNPATAARRTHPSLPKEMVKPPPAEEDTAALRRRLRSLVTALTGEGAVADAFDEAAAALAALREAELSGRGKGARREDMRTVVEAEAVPEQFLCPISSKIMGDPVVVESGQTYDRHFIEEWFSAGNQTCPQSQQVLLNKTLIPNLLIRSMIAQWCTQNGFSLPPVENQNEDHASNSEQRTFDDIFNKITSSSNSTEQKQAIKNLRLLTKRSSEFRAILEERPDSISEMTFSRFSTPELQNDPQVVEDMVTIILNFSLHDSNKKIIGDDPEAIPFLIWALKSGDMGSRSNSAAAIFTLSAVDSNKVKIGELGAMGPLIDLLEHGSIIAKKDAASAIFSLCLLHENRSRATRSGIVDVSMRAIRDQSLTEESL…
Green bristlegrass	XP_034602360.1	LOC117862916	MAKPAPAEEDAAALRRRLRRSLAAVAAGGAAADVYDEAAAALEALREAELGTGGRKGGGGGGEGRRPAAEGEEEKDAVQVPTQFLCPISSRIMSDPVIVSSGQTYDRRCIEEWFSAGNQLCPQTQQALLDTTLIPNHLVRSMILQWCTENRFNLPPAENQEESNATNSDQKTFDEIFKKITSSPKSSEMRQAIKYLRLATKQNSDFRAVLGERPDSISRMIFARSTPGLQNDPQVLEDMVTIILNFSLHDSNKKVIGDDPEAIPFLIWALKSGDMGSRGNSAAAIFTLSALDSNKEKIGELGAIGPLVDLLDNGNIIAKKDAASAIFNLCLLHENKSRATKNGIVDVAMRAIDDQLLVDGSLAILALLSSNHEVVEMITEFDGTACMLRAIRESECSRS…
Foxtail millet	XP_004975335.1	LOC101774532	MAKPAPAEEDAAALRRRLRRSLAAVAAGGAAADVYDEAAAALEALREAELGTGGRKGGGGGGGEGRRPAAEGEEEKDAVQVPTQFLCPISSRIMSDPVIVASGQTYDRRCIEEWFSAGNQLCPQTHQALLDTTLIPNHLVRSMILQWCTENRFNLPPAENQEESNATNSDQKTFDEIFKKITSSPKSSEMRQAIKYLRLATKQNSDFRAVLGERPDSISRMIFARSTPGLQNDPQVLEDMVTIILNFSLHDSNKKVIGDDPEAIPFLIWALKSGDMGSRGNSAAAIFTLSALDSNKEKIGELGAIGPLVDLLDNGNIIAKKDAASAIFNLCLLHENKSRATKNGIVDVAMRAIDDQLLVDGSLAILALLSSNHEVVEMITEFDGTACMLRAIRESECSR…
Switch grass	XP_039772432.1	LOC120640607	MAKPAPADEDAAALRRQLRRSLAAVAAGGAAADVYDEAAAALEALREAELGSGGRKGGGEGRRPAAEGGEEKEAVPVPPQFLCPISSRIMTDPVIVASGQTYDRRSIEEWFSAGKQLCPQTQQALLETTLIPNHLVRSMILQWCTENKFNPPTVENQEENNVTNSDQKTFDEIFKKITSSAKSTEMRQAIKDLRLITKQNSDFRAVLGERPDSISRMIFARSTPGLQNDLQVLEDMVTIILNFSLHDSNKKVIGHDPEAIPFLIWALKSGDMGSRGNSAAAIFTLSALDSNKEKIGELGAMGPLVDLLENGNIIAKKDAASAIFNLCLLHENKSRATKNGIVDVAMRAIDDQLLVDGSLAILALLSSNHEVVEMITEFDGTACMLRAIRESECSRSKEN…
Panic grass	XP_025824608.1	LOC112900090	MGNTVAAQTMAKPAPAEEDAAALRRRLRRSLAAVAAGGAAADVYDEAAAALEALREAELGTGGRKGGGGGGGEGRRPAAEGGEEKEAVPVPPQFLCPISSMVMSDPVIVASGQTYDRRSIEEWFSAGNQLCPQTQQALLDTTLIPNHLVRSMILQWCTENRFNLPPVENQEENNVTNSDQKTFDEIFKKITSSAKSTEMRQAIKDLRLITKQNSDFRAVLGERPDYISRMIFARSTPGLQNDPQVLEDMVTIILNFSLHESNKKVIGDDPEAVPFLIWALKSGDMGSRGNSAAAIFTLSALDSNKVKIGELGAMGPLVDLLDNGNIIAKKDAASAIFNLCLLHENKSRAQKNGIVDVAMRAIDDQLLVDGSLAILALLSNNHEVVEMITEFDGTACMLR…
Panic grass	XP_025824610.1	LOC112900090	MAKPAPAEEDAAALRRRLRRSLAAVAAGGAAADVYDEAAAALEALREAELGTGGRKGGGGGGGEGRRPAAEGGEEKEAVPVPPQFLCPISSMVMSDPVIVASGQTYDRRSIEEWFSAGNQLCPQTQQALLDTTLIPNHLVRSMILQWCTENRFNLPPVENQEENNVTNSDQKTFDEIFKKITSSAKSTEMRQAIKDLRLITKQNSDFRAVLGERPDYISRMIFARSTPGLQNDPQVLEDMVTIILNFSLHESNKKVIGDDPEAVPFLIWALKSGDMGSRGNSAAAIFTLSALDSNKVKIGELGAMGPLVDLLDNGNIIAKKDAASAIFNLCLLHENKSRAQKNGIVDVAMRAIDDQLLVDGSLAILALLSNNHEVVEMITEFDGTACMLRAIRESECSR…
Rice	XP_015633809.1	OsPUB7	MAKPAPAPAAGAREDEDAPALRRRLRRLVAAATAGAASESVLDEAAAALAALRDAEVGVGRKGVGGGEEAAAAAVPALFLCPISSGIMRDPVVIESGQTYDRRSIQEWFSAGNQICPQTQQVLSHTIVIPNHLVRTMISQWCTENGLTLPEIENQEQDHVTNSEEKTFDEIFVKITSSANSGGRKQAIKDLRLLTKRNSEFRAVLGQRPDSIAQMILARSTPGLQNDPQVLEDMVTIILNFSIHDSNKKIIGDDSEAIQFLIWALKSGDMGSRSNSAAAIFTLSALDSNKEKIGKLGAMDPLIDLLEHGSIIAKKDAASAIFNLCLLHENRSIAARSGIVDVAMRAIDDQSLVEESLAILALLSRNQEMVEIITEFNGTASMLRSIRESECKRSKENAM…
Wild rice	XP_006653286.3	LOC102701076	MAKPPPTEGEAEDAAALRRRLRRLVASATAGGAPAAVFDEAAAALAALREAEVGGGGRKGAAGGGGEEAAAAVVPARFLCPISSEIMRDPVVIESGQTYDRQFIEEWFSAGNQICPQTQQVLSHTILIPNQLVRTMISQWCMENGITLPQIESQNGDRVICQNEDRVICQNGDRDICQNSEQKKFDEIFVKITSATSSGERKQAIKDLRLLTKRNSEFRVVLEQRPDSIAQMILARSTPGLQNDAQVLEDMVTIILNFSIHDSNKKIIGDDSEAIQFLIWALKSGDMGSRSNSAAAIFTLSAIDSNKEKIGELGAMEPLIDLLEHGNIIAKKDAASAIFNLCLLQENRSIATRSGIIDVAMRAIEDHSLVNESLAILALLSRNHEMVEIITEFNGTASM…
Rice	XP_015626779.1	LOC9267566	MAKSTPAAAAAAPEEATAAALRLRLRRLVAAVTAGGVGGGEAFDEAASALAALRDAELGPPPKDRPGAGAERRRSGHAEAAAVPEQFLCPISSEIMRDPVVLASGQTYDRRFIQEWLSAGNRTCPQTQQVLSNTILIPNHLVRSMIAQWCTENGIALSPLENQEEDLVTNNERKSFSELFDRISSSSNISEKRQAIKDLRLLTKRNSSFRAVIGENPDSISQMISAVSNPELESNSEVLEDTVTTILNLSIHESNKKIIGDDTKAITFLISALQSGTMEARSNAAAAIFSLSALDSNKAKIGESGAMRPLVDLLEHGSMTAKKDAASAIFSLCKLHENKSRATKSGVIDVVLKAISDESLTDESLTILALLSSDHETVEEIGETGGVPCMLHIIKDDQC…
Wild rice	XP_006648643.2	LOC102713800	MANSAPAEEAAALRRRLRRLVAAVTAGGGTGPEAFGEAASALAALRDAELGPRKAGGGAGAEAAVPEHFLCPISSEIMRDPVVLASGQTYDRRFIQEWLSAGNRTCPQTQQVLSNTVLIPNHLVRSMIAQWCTENGIALSPLENQEEDLVTNNERKAFSELFDRISSSSDISEKKQAIKDLRLLTKRNSSFRAVIGENPDSISQMISAVSNAELESNSEVLEDTVTTILNLSIHESNKKIIGDDTKAVTFLISALQSGTMEARSNAAAAIFSLSALDSNKAKIGESGAMRPLVDLLEHGSMTAKKDAASAIFSLCKLHENKSRATRSGIIDVVLKSISDESLIDEALTILALLSSDHETVEEIGETGGVPCMLRIVSDDQCKRNKENAVAVLFSICMYD…
Sorghum	XP_002453828.1	LOC8056679	MAKPTPVASAEEAAAMRRRLRRLVAAVAAGSADAEAFDEAAEALAKLRDAELGPRKDNRAGDGHGDGGQNRRRTETEAAVPEHFLCPISSEIMRDPVVLASGQTYDRRFIQEWLSAGNRTCPQTQQVLSNTIIIPNHLVRSMISQWCTDNGITLPPVENQDEDLVTNNERKTFSKIFERIASSSNLSEQREAIKDLRLLTKCNSSLRAAIGEKPDSISQIISVASNPELENNAEVLEDMVTTILNLSIHESNKKIIGDDPLAIPFLIRTLQSGTMEARSNAAAAIFSLSALDSNKVKIGELGVMRPLVDLLEHGSMIAKKDAASAIFNLCMLHENKSRATKSGVIDVTLKAITDDSLVDESLAILALLSGDHETVEEIGETGGVASMLHVIKEDQCKRN…
Maize	NP_001150782.1	LOC100284415	MAKPTPVASAEEAAAMRRRLRRLVAAVAAGSADAEAFDEAAEALAKLRDAELGPRKDRTGDGRENKRSTEAAVPEHFLCPISSEIMRDPVVLASGQTYDRRFIQEWLSAGNRTCPQTQQVLSNTIITPNHLVRSMISQWCTDNGITLPPVENQDEDLVTNNERETFRKLFERIVSSSSDLSEQREAIKELRLRTKCNSSLRAAIGERPDSISQMISVASSPELENSAEVVEDTVTAILNLSIHESNKKIIGDDPLAVPFLIKALQSGTMEARSNAAAAIFSLSALDGNKARIGELGAMRPLVELLEHGSTAARKDAASAIFNLCTLHENKSRATKSGAVDVTLRAVACAGDGSGSGSLVDESLAVLALLSGDHEAVEEVGETGGVASMLHVVKDDPCKR…
Switch grass	XP_039841666.1	LOC120701934	MAKPTPVASAEEAAALRRRLRRLVAAVAAGSADAEAFDEAAEALAKLRDGELGPRKDRAVAAGGGVDKGGTEAAAVPEQFLCPISSEIMRDPVVLASGQTYDRRFIQEWLSAGNRTCPQTQQVLSNTILIPNHLVRSMISQWCTDNGITLPPVENQEEDLVTNNERKTFSKIFERIASSSNLSEQREAIKDLRLLTKCNSSLRAAIGEKPDSISQMISTVSNPELENNAEVLEDMVTTILNLSIHESNKKIIGDDPLAIPFLIRTLQSGTMEARSNAAAAIFSLSALNSNKAKIGELGAMRHLVDLLEHGSMIAKKDAASAIFNLCMLHENKSRATKSGVIDVTLKAIADDSLVDESLAILALLSGDHETVEEIGETGGVASMLRVIKEDQCKRNKENA…
Switch grass	XP_039789647.1	LOC120655747	MAKPTPVASPEEAAALRRRLRRLVATVAAGSADAEAFDEAAEALAKLRDAELAPRKDRAVAAAGGVGKGGAEAAAVPEQFLCPISSEIMRDPVVLASGQTYDRRFIQEWLSAGNRTCPQTQQVLSNTILIPNHLVRSMISQWCTDNGITLPPVENQDEDLITNNERKTFSKIFERIASSSSLSEQREAIKDLRLLTKSNSSLRAAIGENPDSISQMISTVSNPELENNADVLEDMVTTILNLSIHESNKKIIGDDPLAPPFLIRALQSGTMEARSNAAAAIFSLSALNSNKVKIGELGAMRPLVDLLEHGSMIAKKDAASAIFNLCMLHENKSRATKSGVIDVTLKAIADDLLVDESLAILALLSGDHETVEEIGETGGVASMLGVIKEDQCKRNKENA…
Green bristlegrass	XP_034589247.1	LOC117851524	MAKPTPVASAEEAAALRRRLRRLVAAVAAGSADAEAFDEAAEALAKLRDAELGPRKDRAGAGGGGGGVNKGGAEAAVVPEQFLCPISSEIMRDPVVLASGQTYDRHFIQEWLGAGNRTCPQTQQVLSNTILIPNHLVRSMISQWCTDNGITLPPVENQEEDLVTKNERKTFSKIFERIASSSNLSEQREAIKDLRLLTKCNSSLRAAIGEKPDSISQMISTVSNPELENNAEVLEDMVTTILNLSIHESNKKIIGDDPLAIPFLIRALQSGTMEARSNSAAAIFSLSALNSNKAKIGELGAMRPLVDLLEHGSMIAKKDAASAIFNLCMLHENKSRASKSGVIDVTLKAIADDLLVDESLAILALLSGDHETVEEIGETGGVASMLRVIKEDQCKRNKE…
Foxtail millet	XP_025812492.1	LOC112889891	MPWYWSLFDETFMSSTNFVPWLNSFRVVLGSCFHCLITSGIVLGSCFNCFKRSSESYTILTYDRRFIQEWLSAGNRTCPQTQQVLSNTILIPNHLVRSMILQWCTDNGITLPPVENQEEDLVTNNERKTFSKIFERIASSSNLSEQREAIKDLRLLTKCNSSLRAAIGEKPDSISQMISTVSNPELENNAEVLEDMVTTVLNLSIHESNKKIIGDDSMAIPFLIRALQSGTMEARSNAAAAIFSLSALNSNKAKIGELGAMRPLVDLLEHGSMIAKKDAASAIFNLCMLHENKSRATKSGVIDVTLKAIVDDSLVDESLAILALLSGDHETVEEIGETGGVASMLRVIKEDQCKRNKENAAAVLFAVCMYDRTKLREVAEDENLNGSLAWLAQNGTSRA…
Panic grass	XP_025812487.1	LOC112889891	MAKPTPVASAEEAAALRRRLRRLVAAVAAGSADAEAFDEAAEALAKLRDAELGPRKDRAVAGCGGVNKGGTEAAAVPEQFLCPISSEIMRDPVVLASGQTYDRRFIQEWLSAGNRTCPQTQQVLSNTILIPNHLVRSMILQWCTDNGITLPPVENQEEDLVTNNERKTFSKIFERIASSSNLSEQREAIKDLRLLTKCNSSLRAAIGEKPDSISQMISTVSNPELENNAEVLEDMVTTVLNLSIHESNKKIIGDDSMAIPFLIRALQSGTMEARSNAAAAIFSLSALNSNKAKIGELGAMRPLVDLLEHGSMIAKKDAASAIFNLCMLHENKSRATKSGVIDVTLKAIVDDSLVDESLAILALLSGDHETVEEIGETGGVASMLRVIKEDQCKRNKENA…
Panic grass	XP_025812469.1	LOC112889891	MAKPTPVASAEEAAALRRRLRRLVAAVAAGSADAEAFDEAAEALAKLRDAELGPRKDRAVAGCGGVNKGGTEAAAVPEQFLCPISSEIMRDPVVLASGQEKEKVCILSFSYNWTYDRRFIQEWLSAGNRTCPQTQQVLSNTILIPNHLVRSMILQWCTDNGITLPPVENQEEDLVTNNERKTFSKIFERIASSSNLSEQREAIKDLRLLTKCNSSLRAAIGEKPDSISQMISTVSNPELENNAEVLEDMVTTVLNLSIHESNKKIIGDDSMAIPFLIRALQSGTMEARSNAAAAIFSLSALNSNKAKIGELGAMRPLVDLLEHGSMIAKKDAASAIFNLCMLHENKSRATKSGVIDVTLKAIVDDSLVDESLAILALLSGDHETVEEIGETGGVASMLR…
Panic grass	XP_025812478.1	LOC112889891	MAKPTPVASAEEAAALRRRLRRLVAAVAAGSADAEAFDEAAEALAKLRDAELGPRKDRAVAGCGGVNKGGTEAAAVPEQFLCPISSEIMRDPVVLASGQEKEKTYDRRFIQEWLSAGNRTCPQTQQVLSNTILIPNHLVRSMILQWCTDNGITLPPVENQEEDLVTNNERKTFSKIFERIASSSNLSEQREAIKDLRLLTKCNSSLRAAIGEKPDSISQMISTVSNPELENNAEVLEDMVTTVLNLSIHESNKKIIGDDSMAIPFLIRALQSGTMEARSNAAAAIFSLSALNSNKAKIGELGAMRPLVDLLEHGSMIAKKDAASAIFNLCMLHENKSRATKSGVIDVTLKAIVDDSLVDESLAILALLSGDHETVEEIGETGGVASMLRVIKEDQCKRN…
Arabidopsis	NP_566304.1	PUB7	MDVTELEENLFAASDAKLHGDMCKELSGVLCKVLSIFPSLEGARPRSKSGIQALCSLHIALEKAKNILQHCSECSKLYLAITGDAVLLKFEKAKIALIDGLKRVEDIVPSSIGSQILEIVGELENTRFMLDPSEKEVGDQIIALLQQGKKFDNCNDNTELEIFHRAATRLSITSSRVALAERRALKKLIDRARAEEDKRKESIVAYLLHLMRKCSKLFRSEILDENDSPGSYPCSPNEDHGSVHGFGRQLSRFGSLNDKPMNSINSGQMPVPPEELRCPISLQLMCDPVIIASGQTYERVCIEKWFSDGHNTCPKTQQQLPHISLTPNNCVKGLIASWCEQNGTQIPSGPPESQDLDYWRLALSDSESTKSQSVNSIGSYKLKGVKIVPLEENGTTVVE…

## Sheet: Supplementary Table S2
Supplementary Table S2. Identification of mutation genotypes in OsPUB7 generated using CRISPR/Cas9 technology using NGS analysis.
WT
TGTCATTCCTAACCACCTTGTTCGTACCATGA--TCTCACAGTGGTGCACAGAAAA	WT
TGTCATTCCTAACCACCTTGTTCGTACCATGA--TCTCACAGTGGTGCACAGAAAA	WT
T0 Homozygous InDel (K343-22)
TGTCATTCCTAACCACCTTGTTCGTACCATGA--T-TCACAGTGGTGCACAGAAAA	(-1)
TGTCATTCCTAACCACCTTGTTCGTACCATGA--T-TCACAGTGGTGCACAGAAAA	(-1)
T0 Homozygous InDel (K343-23)
TGTCATTCCTAACCACCTTGTTCGTACCATGA--T-TCACAGTGGTGCACAGAAAA	(-1)
TGTCATTCCTAACCACCTTGTTCGTACCATGA--T-TCACAGTGGTGCACAGAAAA	(-1)
T0 Homozygous InDel (K343-26)
TGTCATTCCTAACCACCTTGTTCGTACCATGAT-TCTCACAGTGGTGCACAGAAAA	(+1)
TGTCATTCCTAACCACCTTGTTCGTACCATGAT-TCTCACAGTGGTGCACAGAAAA	(+1)
T0 Homozygous InDel (K343-31)
TGTCATTCCTAACCACCTTGTTCGTACCATGAA-TCTCACAGTGGTGCACAGAAAA	(+1)
TGTCATTCCTAACCACCTTGTTCGTACCATGAA-TCTCACAGTGGTGCACAGAAAA	(+1)
T0 Bi-allelic InDel (K343-7)
TGTCATTC---------------------------CTCACAGTGGTGCACAGAAAA	(-25)
TGTCATTCCTAACCACCTTGTTCGTACCATGA----TCACAGTGGTGCACAGAAAA	(-2)
T0 Bi-allelic InDel (K343-8)
TGTCATTCTCA------------------------CACACAGTGGTGCACAGAAAA	(-22)
TGTCATTCCTAACCACCTTGTTCGTACCATGAT-TCTCACAGTGGTGCACAGAAAA	(+1)
T0 Bi-allelic InDel (K343-16)
TGTCATTCCTAACCACCTTGTTCGTACCATGAT-TCTCACAGTGGTGCACAGAAAA	(+1)
TGTCATTCCTAACCACCTTGTTCGTACCATGAG-TCTCACAGTGGTGCACAGAAAA	(+1)
T0 Bi-allelic InDel (K343-17)
TGTCATTCCTAACCACCTTGTTCGTACCAT----TCTCACAGTGGTGCACAGAAAA	(-2)
TGTCATTCCTAACCACCTTGTTCGTACCATGAT-TCTCACAGTGGTGCACAGAAAA	(+1)
T0 Bi-allelic InDel (K343-20)
TGTCATTCCTAACCACCTTGTTCGTACCAT----TCTCACAGTGGTGCACAGAAAA	(-2)
TGTCATTCCTAACCACCTTGTTCGTACCATGAT-TCTCACAGTGGTGCACAGAAAA	(+1)
T0 Bi-allelic InDel (K343-27)
TGTCATTCCTAACCACCTTGTTCGTACCAT----TCTCACAGTGGTGCACAGAAAA	(-2)
TGTCATTCCTAACCACCTTGTTCGTACCATGAT-TCTCACAGTGGTGCACAGAAAA	(+1)
T0 Heterozygous InDel (K343-11)
TGTCATTCCTAACCACCTTGTTCGTACCATGAT-TCTCACAGTGGTGCACAGAAAA	(+1)
TGTCATTCCTAACCACCTTGTTCGTACCATGA--TCTCACAGTGGTGCACAGAAAA	WT
T0 Heterozygous InDel (K343-12)
TGTCATTCCTAACCACCTTGTTCGTACCATGAT-TCTCACAGTGGTGCACAGAAAA	(+1)
TGTCATTCCTAACCACCTTGTTCGTACCATGA--TCTCACAGTGGTGCACAGAAAA	WT
T0 Heterozygous InDel (K343-14)
TGTCATTCCTAACCACCTTGTTCGTACCATGAG-TCTCACAGTGGTGCACAGAAAA	(+1)
TGTCATTCCTAACCACCTTGTTCGTACCATGA--TCTCACAGTGGTGCACAGAAAA	WT
T0 Heterozygous InDel (K343-19)
TGTCATTCCTAACCACCTTGTTCGTACCATGAG-TCTCACAGTGGTGCACAGAAAA	(+1)
TGTCATTCCTAACCACCTTGTTCGTACCATGA--TCTCACAGTGGTGCACAGAAAA	WT
T0 Heterozygous InDel (K343-25)
TGTCATTCCTAACCACCTTGTTCGTACCATGAACTCTCACAGTGGTGCACAGAAAA	(+2)
TGTCATTCCTAACCACCTTGTTCGTACCATGA--TCTCACAGTGGTGCACAGAAAA	WT

## Sheet: Supplementary Table S3
Supplementary Table S3. Statistics for RNA-sequencing libraries under drought and salinity stress.
Library name		Clean reads	Clean bases	GC content (%)	Cycle Q30 (%)
Control	CDongjin_1_DAT0	40358432	5973211984	54.56	93.74
	CDongjin_2_DAT0	37494086	5520308777	53.31	93.52
	C8_1_1_DAT0	40361814	5940288730	53.94	94.07
	C8_1_3_DAT0	60682342	8947099615	54.15	93.17
Drought	DDongjin_1_DAT3	41358644	6114756567	52.85	92.49
	DDongjin_3_DAT3	55798040	8237880998	53.26	92.62
	D8_1_1_DAT3	42733754	6317327129	52.58	92.76
	D8_1_2_DAT3	47368552	7006438433	52.93	92.64
Salinity	SDongjin_1_DAT3	48101214	7079422590	53.08	92.79
	SDongjin_3_DAT3	52514796	7712102953	51	93.24
	S8_1_2_DAT3	51227806	7536868275	51.53	92.35
	S8_1_3_DAT3	50582212	7461020073	52.17	93.55

## Sheet: Supplementary Table S4
Supplementary Table S4. Summary of RNA-sequencing clean reads and mapped reads ration against in the rice reference genome.
Library name		Reads clean count (%)	Mapped reads (%)	Uniquely mapped reads (%)
Control	CDongjin_1_DAT0	40358432	37604836	34365894
		99.31	92.54	84.57
	CDongjin_2_DAT0	37494086	33025198	29925012
		98.61	86.86	78.71
	C8_1_1_DAT0	40361814	37731834	35089218
		99.09	92.64	86.15
	C8_1_3_DAT0	60682342	56659636	52291676
		98.27	91.76	84.69
Drought	DDongjin_1_DAT3	48101214	43538704	38472740
		98.39	89.05	78.69
	DDongjin_3_DAT3	52514796	48312826	44025932
		99.15	91.22	83.13
	D8_1_1_DAT3	51227806	43825494	36456022
		98.95	84.65	70.42
	D8_1_2_DAT3	50582212	46854452	43950764
		99.17	91.87	86.17
Salinity	SDongjin_1_DAT3	41358644	37621022	32690916
		98.75	89.83	78.06
	SDongjin_3_DAT3	55798040	50975934	45285418
		98.91	90.36	80.27
	S8_1_2_DAT3	42733754	37422970	32185042
		98.66	86.4	74.3
	S8_1_3_DAT3	47368552	42842658	39087328
		98.8	89.36	81.53
